# Supplementary material for: Use, Durability, and Risks for Discontinuation of Initial and Subsequent Biologics in a Large Pediatric-Onset IBD Cohort
Source: PubMed Central journal article supplement — J Pediatr Gastroenterol Nutr. 2023 Feb 19;76(5):566–75. doi: 10.1097/MPG.0000000000003734 (PMC10097486; doi:10.1097/mpg.0000000000003734), 2023-02-19
Supplement: mpg-76-566-s001.pdf [file mpg-76-566-s001.pdf]

**Supplemental Digital Content**

**Figure, Supplemental Digital Content 1. Cohort selection.**

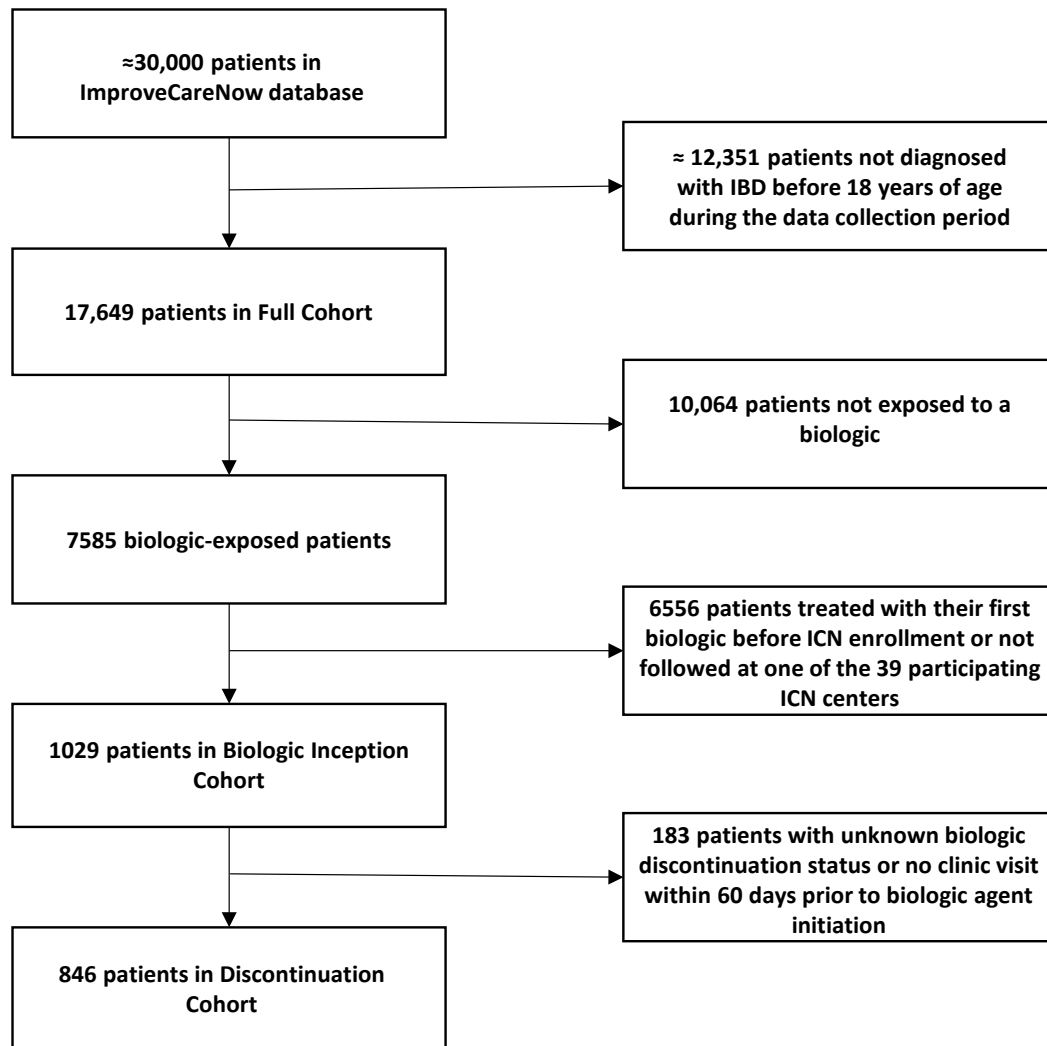

IBD = inflammatory bowel disease; ICN = ImproveCareNow.
