# Supplementary material for: Use, Durability, and Risks for Discontinuation of Initial and Subsequent Biologics in a Large Pediatric-Onset IBD Cohort
Source: PubMed Central journal article supplement — J Pediatr Gastroenterol Nutr. 2023 Feb 19;76(5):566–75. doi: 10.1097/MPG.0000000000003734 (PMC10097486; doi:10.1097/mpg.0000000000003734), 2023-02-19
Supplement: mpg-76-566-s002.pdf [file mpg-76-566-s002.pdf]

**Table, Supplemental Digital Content 2.** Patient demographics and disease characteristics of the three cohorts

| Characteristics, n (%)         |  | Full Cohort<br>(N = 17,649) | Biologic<br>Inception Cohort<br>(N = 1029) | Discontinuation Cohort      |                              |
|--------------------------------|--|-----------------------------|--------------------------------------------|-----------------------------|------------------------------|
|                                |  |                             |                                            | First biologic<br>(n = 846) | Second biologic<br>(n = 119) |
| Diagnosis                      |  |                             |                                            |                             |                              |
| Crohn's disease                |  | 12,410 (70)                 | 809 (79)                                   | 678 (80)                    | 92 (77)                      |
| Ulcerative colitis             |  | 5239 (30)                   | 220 (21)                                   | 168 (20)                    | 27 (23)                      |
| Biologic-exposed               |  | 7585 (43)                   | 1029 (100)                                 | 846 (100)                   | 119 (100)                    |
| Crohn's disease                |  | 6262 (50)                   | ALL                                        | ALL                         | ALL                          |
| Ulcerative colitis             |  | 1323 (25)                   | ALL                                        | ALL                         | ALL                          |
| Sex                            |  |                             |                                            |                             |                              |
| Male                           |  | 9905 (56)                   | 583 (57)                                   | 478 (57)                    | 61 (51)                      |
| Female                         |  | 7743 (44)                   | 446 (43)                                   | 368 (43)                    | 58 (49)                      |
| Race                           |  |                             |                                            |                             |                              |
| American Indian/Alaska Native  |  | 35 (0)                      | 1 (0)                                      | 0                           | 0                            |
| Asian                          |  | 358 (2)                     | 15 (2)                                     | 15 (2)                      | 1 (1)                        |
| Native Hawaiian/Pacific Island |  | 13 (0)                      | 1 (0)                                      | 1 (0)                       | 0                            |
| Black/African American         |  | 1758 (10)                   | 104 (10)                                   | 82 (10)                     | 17 (14)                      |
| White                          |  | 13,437 (76)                 | 774 (75)                                   | 643 (76)                    | 83 (70)                      |
| Multiracial                    |  | 155 (1)                     | 7 (1)                                      | 5 (1)                       | 2 (2)                        |
| Other                          |  | 449 (3)                     | 20 (2)                                     | 17 (2)                      | 4 (3)                        |
| Missing                        |  | 1444 (8)                    | 107 (10)                                   | 83 (10)                     | 12 (10)                      |
| Ethnicity                      |  |                             |                                            |                             |                              |
| Hispanic                       |  | 847 (5)                     | 32 (3)                                     | 26 (3)                      | 4 (3)                        |
| Non-Hispanic                   |  | 10,742 (61)                 | 666 (65)                                   | 559 (66)                    | 67 (56)                      |
| Missing                        |  | 6060 (34)                   | 331 (32)                                   | 261 (31)                    | 48 (40)                      |

|                      |  |           |          |          |         |
|----------------------|--|-----------|----------|----------|---------|
| Age at IBD diagnosis |  |           |          |          |         |
| <6 years             |  | 1509 (9)  | 66 (6)   | 54 (6)   | 8 (7)   |
| 6 to <12 years       |  | 6774 (38) | 445 (43) | 374 (44) | 57 (48) |
| 12 to <18 years      |  | 9366 (53) | 515 (50) | 415 (49) | 54 (45) |
| Age at analysis      |  |           |          |          |         |
| <6 years             |  | 169 (1)   | 7 (1)    | 6 (1)    | 0       |
| 6 to <12 years       |  | 1985 (11) | 126 (12) | 109 (13) | 16 (13) |
| 12 to <18 years      |  | 7594 (43) | 611 (59) | 518 (61) | 70 (59) |
| ≥18 years            |  | 7901 (45) | 285 (28) | 213 (25) | 33 (28) |

For the Discontinuation Cohort, PGA was assessed at baseline for biologic treatment.

IBD = inflammatory bowel disease; PGA = Physician Global Assessment.
