# Supplementary material for: Use, Durability, and Risks for Discontinuation of Initial and Subsequent Biologics in a Large Pediatric-Onset IBD Cohort
Source: PubMed Central journal article supplement — J Pediatr Gastroenterol Nutr. 2023 Feb 19;76(5):566–75. doi: 10.1097/MPG.0000000000003734 (PMC10097486; doi:10.1097/mpg.0000000000003734), 2023-02-19
Supplement: mpg-76-566-s003.pdf [file mpg-76-566-s003.pdf]

**Table, Supplemental Digital Content 3.** Pattern of use of first biologic agent and numbers of subsequent biologic agents used in Crohn's disease and ulcerative colitis (Chart Review Cohort; N = 1029)

|                                                                                   | Crohn's disease<br>(N = 809) | Ulcerative<br>colitis (N = 220) | Overall<br>(N = 1029) | <i>P</i><br>value* |
|-----------------------------------------------------------------------------------|------------------------------|---------------------------------|-----------------------|--------------------|
| Time from diagnosis to initiation of first biologic agent (days), median (Q1, Q3) | 325 (121, 740)               | 423 (208, 938)                  | 356 (139, 779)        | 0.004              |
| Discontinued first biologic agent, n (%)                                          | 165 (20)                     | 69 (31)                         | 234 (23)              | 0.003              |
| Reasons for discontinuation of first biologic agent, n (%)                        |                              |                                 |                       | 0.008              |
| Intolerance <sup>†</sup>                                                          | 42 (25)                      | 11 (16)                         | 53 (23)               |                    |
| Primary lack of effectiveness                                                     | 24 (15)                      | 20 (29)                         | 44 (19)               |                    |
| Secondary loss of response                                                        | 66 (40)                      | 25 (37)                         | 91 (39)               |                    |
| Financial barriers                                                                | 1 (1)                        | 0 (0)                           | 1 (<1)                |                    |
| Pain with injections                                                              | 1 (1)                        | 1 (1)                           | 2 (1)                 |                    |
| Choice                                                                            | 20 (12)                      | 2 (3)                           | 22 (9)                |                    |
| Unknown                                                                           | 5 (3)                        | 2 (3)                           | 7 (3)                 |                    |
| Other                                                                             | 6 (4)                        | 8 (12)                          | 14 (6)                |                    |
| Number of biologic agents used, n (%)                                             |                              |                                 |                       | ‡                  |
| ≥2                                                                                | 132 (16)                     | 43 (20)                         | 175 (17)              |                    |
| ≥3                                                                                | 18 (2)                       | 6 (3)                           | 24 (2)                |                    |
| ≥4                                                                                | 5 (0.6)                      | 1 (<1)                          | 6 (1)                 |                    |
| Positioning of biologic agent use, n (%)                                          |                              |                                 |                       | ‡                  |
| Adalimumab <sup>§</sup>                                                           |                              |                                 |                       |                    |
| First <sup>  </sup>                                                               | 104 (13)                     | 19 (9)                          | 123 (12)              |                    |
| Second <sup>¶</sup>                                                               | 104 (79)                     | 31 (72)                         | 135 (77)              |                    |
| Third <sup>#</sup>                                                                | 1 (6)                        | 2 (33)                          | 3 (13)                |                    |

|                                 |          |          |          |   |
|---------------------------------|----------|----------|----------|---|
| Fourth**                        | 1 (20)   | -        | 1 (17)   |   |
| Certolizumab pegol <sup>§</sup> |          |          |          | ‡ |
| First <sup>  </sup>             | 2 (<1)   | 0 (0)    | 2 (<1)   |   |
| Second <sup>¶</sup>             | 0 (0)    | 0 (0)    | 0 (0)    |   |
| Third <sup>#</sup>              | 89 (44)  | 0 (0)    | 8 (33)   |   |
| Fourth**                        | 0 (0)    | -        | 0 (0)    |   |
| Golimumab <sup>§</sup>          |          |          |          | ‡ |
| First <sup>  </sup>             | 0 (0)    | 1 (1)    | 1 (<1)   |   |
| Second <sup>¶</sup>             | 0 (0)    | 1 (2)    | 1 (1)    |   |
| Third <sup>#</sup>              | 0 (0)    | 1 (17)   | 1 (4)    |   |
| Fourth**                        | 0 (0)    | -        | 0 (0)    |   |
| Infliximab <sup>§</sup>         |          |          |          | ‡ |
| First <sup>  </sup>             | 703 (87) | 200 (91) | 903 (88) |   |
| Second <sup>¶</sup>             | 23 (17)  | 7 (16)   | 30 (17)  |   |
| Third <sup>#</sup>              | 2 (11)   | 1 (17)   | 3 (13)   |   |
| Fourth**                        | 0 (0)    | -        | 0 (0)    |   |
| Ustekinumab                     |          |          |          | ‡ |
| First <sup>  </sup>             | 0 (0)    | 0 (0)    | 0 (0)    |   |
| Second <sup>¶</sup>             | 1 (1)    | 0 (0)    | 1 (1)    |   |
| Third <sup>#</sup>              | 0 (0)    | 0 (0)    | 0 (0)    |   |
| Fourth**                        | 0 (0)    | 0 (0)    | 0 (0)    |   |
| Vedolizumab                     |          |          |          | ‡ |
| First <sup>  </sup>             | 0 (0)    | 0 (0)    | 0 (0)    |   |
| Second <sup>¶</sup>             | 4 (3)    | 4 (9)    | 8 (5)    |   |
| Third <sup>#</sup>              | 7 (39)   | 2 (33)   | 9 (38)   |   |
| Fourth**                        | 4 (80)   | 1 (100)  | 5 (83)   |   |

\*The *P* values were from the log-rank test for the time-to-event variable and exact Chi-square test for categorical variables.

†Intolerance was defined as an allergic reaction or other drug side effect.

‡No tests were done either because of the nested samples (eg, patients who used  $\geq 3$  biologics were also included in those who used  $\geq 2$  biologics) or because each row represented different samples (reasons explained in footnotes  $\parallel$  through \*\* below).

§Anti-TNF agent.

$\parallel$ The denominator is  $N = 809$  for CD patients and  $N = 220$  for UC patients who all used  $\geq 1$  biologics.

$\nabla$ The denominator is  $N = 132$  for CD patients and  $N = 43$  for UC patients who all used  $\geq 2$  biologics.

#The denominator is  $N = 18$  for CD patients and  $N = 6$  for UC patients who all used  $\geq 3$  biologics.

\*\*The denominator is  $N = 5$  for CD patients and  $N = 1$  for UC patients who all used  $\geq 4$  biologics.

CD = Crohn's disease; UC = ulcerative colitis.
