# Supplementary material for: Use, Durability, and Risks for Discontinuation of Initial and Subsequent Biologics in a Large Pediatric-Onset IBD Cohort
Source: PubMed Central journal article supplement — J Pediatr Gastroenterol Nutr. 2023 Feb 19;76(5):566–75. doi: 10.1097/MPG.0000000000003734 (PMC10097486; doi:10.1097/mpg.0000000000003734), 2023-02-19
Supplement: mpg-76-566-s004.pdf [file mpg-76-566-s004.pdf]

**Table, Supplemental Digital Content 4.** First biologic discontinuation by two time periods for patients who initiated the biologic on or before February 2015 from the inception cohort (N = 651).

| Diagnose | Cohort                                       | First Biologic Induction Time Periods |                   |
|----------|----------------------------------------------|---------------------------------------|-------------------|
|          |                                              | On or before 06/2013                  | 07/2013 – 02/2015 |
| CD+UC    | N initiated first biologic in each period    | 238                                   | 413               |
|          | N with unknown discontinuation status        | 19                                    | 17                |
|          | N at risk                                    | 219                                   | 396               |
|          | N discontinued of each time cohort           | 59                                    | 76                |
|          | N censored of each time cohort               | 160                                   | 320               |
|          | Probability of discontinuing first biologic* | 27.4%                                 | 19.6%             |
| CD       | N initiated first biologic in each period    | 204                                   | 324               |
|          | N with unknown discontinuation status        | 15                                    | 15                |
|          | N at risk                                    | 189                                   | 309               |
|          | N discontinued of each time cohort           | 47                                    | 48                |
|          | N censored of each time cohort               | 142                                   | 261               |
|          | Probability of discontinuing first biologic* | 25.2%                                 | 15.8%             |
| UC       | N initiated first biologic in each period    | 34                                    | 89                |
|          | N with unknown discontinuation status        | 4                                     | 2                 |
|          | N at risk                                    | 30                                    | 87                |
|          | N discontinued of each time cohort           | 12                                    | 28                |
|          | N censored of each time cohort               | 18                                    | 59                |
|          | Probability of discontinuing first biologic* | 42.0%                                 | 32.7%             |

\* Kaplan-Meier estimates were calculated. Patients with unknown discontinuation status were excluded from the initial risk set.
