# Supplementary material for: Use, Durability, and Risks for Discontinuation of Initial and Subsequent Biologics in a Large Pediatric-Onset IBD Cohort
Source: PubMed Central journal article supplement — J Pediatr Gastroenterol Nutr. 2023 Feb 19;76(5):566–75. doi: 10.1097/MPG.0000000000003734 (PMC10097486; doi:10.1097/mpg.0000000000003734), 2023-02-19
Supplement: mpg-76-566-s005.pdf [file mpg-76-566-s005.pdf]

**Table, Supplemental Digital Content 53.** Risk factors for discontinuation of biologic agents in patients with ulcerative colitis in the discontinuation cohort (univariate analysis)

|                                                  |                                                    | First Biologic |              |                |         | Second Biologic |              |                |         |
|--------------------------------------------------|----------------------------------------------------|----------------|--------------|----------------|---------|-----------------|--------------|----------------|---------|
| Risk Factor                                      | Measurement                                        | N              | Hazard ratio | 95% CL         | P value | N               | Hazard ratio | 95% CL         | P value |
| Age at biologic initiation                       | Each additional year of age at biologic initiation | 166            | 1.062        | (0.978, 1.153) | 0.1537  | 25              | 0.844        | (0.649, 1.097) | 0.2044  |
| Age at diagnosis                                 | Each additional year of age at diagnosis           | 166            | 1.044        | (0.972, 1.121) | 0.2349  | 25              | 0.900        | (0.764, 1.060) | 0.2079  |
| Time from diagnosis to start of first biologic   | 0 to 3 months vs 3 to 12 months                    | 166            | 0.862        | (0.324, 2.293) | 0.4492  | 19              | -*           | -              | 0.7849  |
|                                                  | 0 to 3 months vs >12 months                        |                | 1.252        | (0.478, 3.281) |         |                 | -            | -              |         |
|                                                  | 3 to 12 months vs >12 months                       |                | 1.453        | (0.812, 2.599) |         |                 | 0.544        | (0.098, 3.018) |         |
| BMI z-score at biologic initiation               | Each additional BMI z-score unit                   | 164            | 0.909        | (0.747, 1.105) | 0.3386  | 24              | 1.802        | (0.685, 4.740) | 0.2329  |
| CRP at biologic initiation                       | Normal vs elevated                                 | 127            | 0.772        | (0.399, 1.494) | 0.4426  | 13              | -*           | -              | -       |
| CRP at biologic initiation relative to ULN range | Each additional CRP unit                           | 92             | 1.041        | (0.962, 1.127) | 0.3142  |                 | -            | -              |         |
| ESR at biologic initiation                       | Normal vs elevated                                 | 120            | 0.758        | (0.404, 1.422) | 0.3881  |                 | -            | -              |         |

|                                                             |                          | First Biologic |              |                |         | Second Biologic |              |                |         |
|-------------------------------------------------------------|--------------------------|----------------|--------------|----------------|---------|-----------------|--------------|----------------|---------|
| Risk Factor                                                 | Measurement              | N              | Hazard ratio | 95% CL         | P value | N               | Hazard ratio | 95% CL         | P value |
| Ethnicity                                                   | Hispanic vs non-Hispanic | 116            | 1.375        | (0.484, 3.904) | 0.5503  |                 | -            | -              |         |
| Extent of disease at biologic initiation - UC               | Pancolitis vs other      | 137            | 1.327        | (0.552, 3.189) | 0.5277  | 19              | -*           | -              | -       |
| Immunomodulator use within the first 6 months post baseline | No vs yes                | 165            | 1.335        | (0.765, 2.330) | 0.3095  | 24              | 0.239        | (0.029, 1.999) | 0.1866  |
| PGA at biologic initiation                                  | Mild vs moderate         | 162            | 0.619        | (0.307, 1.247) | 0.5672  | 21              | -*           | -              | 0.1282  |
|                                                             | Mild vs severe           |                | 0.620        | (0.197, 1.951) |         |                 | 0.060        | (0.006, 0.620) |         |
|                                                             | Moderate vs severe       |                | 1.002        | (0.345, 2.910) |         |                 |              |                |         |
|                                                             | Quiescent vs mild        |                | 1.632        | (0.659, 4.042) |         |                 | 9.063        | (0.761, 107.9) |         |
|                                                             | Quiescent vs moderate    |                | 1.010        | (0.453, 2.254) |         |                 | -            | -              |         |
|                                                             | Quiescent vs severe      |                | 1.012        | (0.303, 3.377) |         |                 | 0.544        | (0.069, 4.320) |         |

|                                                    |                                     | First Biologic |              |                |         | Second Biologic |              |                 |         |
|----------------------------------------------------|-------------------------------------|----------------|--------------|----------------|---------|-----------------|--------------|-----------------|---------|
| Risk Factor                                        | Measurement                         | N              | Hazard ratio | 95% CL         | P value | N               | Hazard ratio | 95% CL          | P value |
| Prednisone or methylprednisolone usage at biologic | No vs yes                           | 166            | 1.298        | (0.749, 2.250) | 0.3519  | 25              | 1.321        | (0.295, 5.914)  | 0.7155  |
| PUCAI                                              | Each additional unit of PUCAI score | 147            | 1.008        | (0.995, 1.020) | 0.2306  | 23              | 1.023        | (0.986, 1.061)  | 0.2226  |
| Race                                               | Black vs non-Black                  | 150            | 0.504        | (0.178, 1.423) | 0.1954  | 22              | 2.144        | (0.390, 11.795) | 0.3806  |
| ESR at biologic initiation                         | Each additional ESR unit            | 120            | 1.009        | (0.997, 1.021) | 0.1379  | 15              | 0.998        | (0.952, 1.047)  | 0.9428  |
| Hematocrit at biologic initiation                  | Each additional hematocrit unit     | 135            | 0.993        | (0.942, 1.047) | 0.7962  | 17              | 0.871        | (0.597, 1.272)  | 0.4760  |
| Extent of disease at diagnosis - UC                | Pancolitis vs other                 | 160            | 1.491        | (0.738, 3.012) | 0.2654  | 25              | 2.720        | (0.323, 22.90)  | 0.3572  |

\*No discontinuation of second biologic was observed in one of the categories in the row variable. Therefore, the hazard ratios for contrasts involving this category are not estimable.

BMI = body mass index; CL = confidence limits; CRP = C-reactive protein; ESR = erythrocyte sedimentation rate; PGA = Physician Global Assessment; PUCAI = Pediatric Ulcerative Colitis Activity Index; UC = ulcerative colitis.
